# Supplementary material for: Genome-wide prediction of prokaryotic two-component system networks using a sequence-based meta-predictor
Source: PubMed Central journal article supplement (PMC4575426; doi:10.1186/s12859-015-0741-7), 2015-09-18

# Acronyms and definitions

- **P+**: Gold standard dataset interacting
- **P-**: Gold standard dataset of non-interacting
- **NP+**: Subset of P+ composed of encoded by neighbouring genes
- **OP+**: Subset of P+ composed of encoded by non-neighbouring genes
- **T**: The dataset compiled in Burger and van Nimwegen, Mol Sys Biol 2008
- **T+**: Interacting included in T dataset
- **T-**: Non-interacting included T dataset
- **SP+**: Subset of P+ dataset composed of present in Burger and van Nimwegen's database (also used to compare to STRING database)
- **SP-**: Subset of P+ dataset composed of present in Burger and van Nimwegen's database (also used to compare to STRING database)
- **Eco** = *Escherichia coli* K-12 MG1655
- **Sll** = *Synechocystis sp.* PCC6803
- **Mll** = *Mesorhizobium loti* MAFF303099
- **Mxan** = *Myxococcus xanthus* DK 1622

NP+ = 56  
OP+ = 57  
SP+ = 44

Eco = 22  
SII = 20  
MII = 20  
Mxan = 20

# P+ Dataset = 113

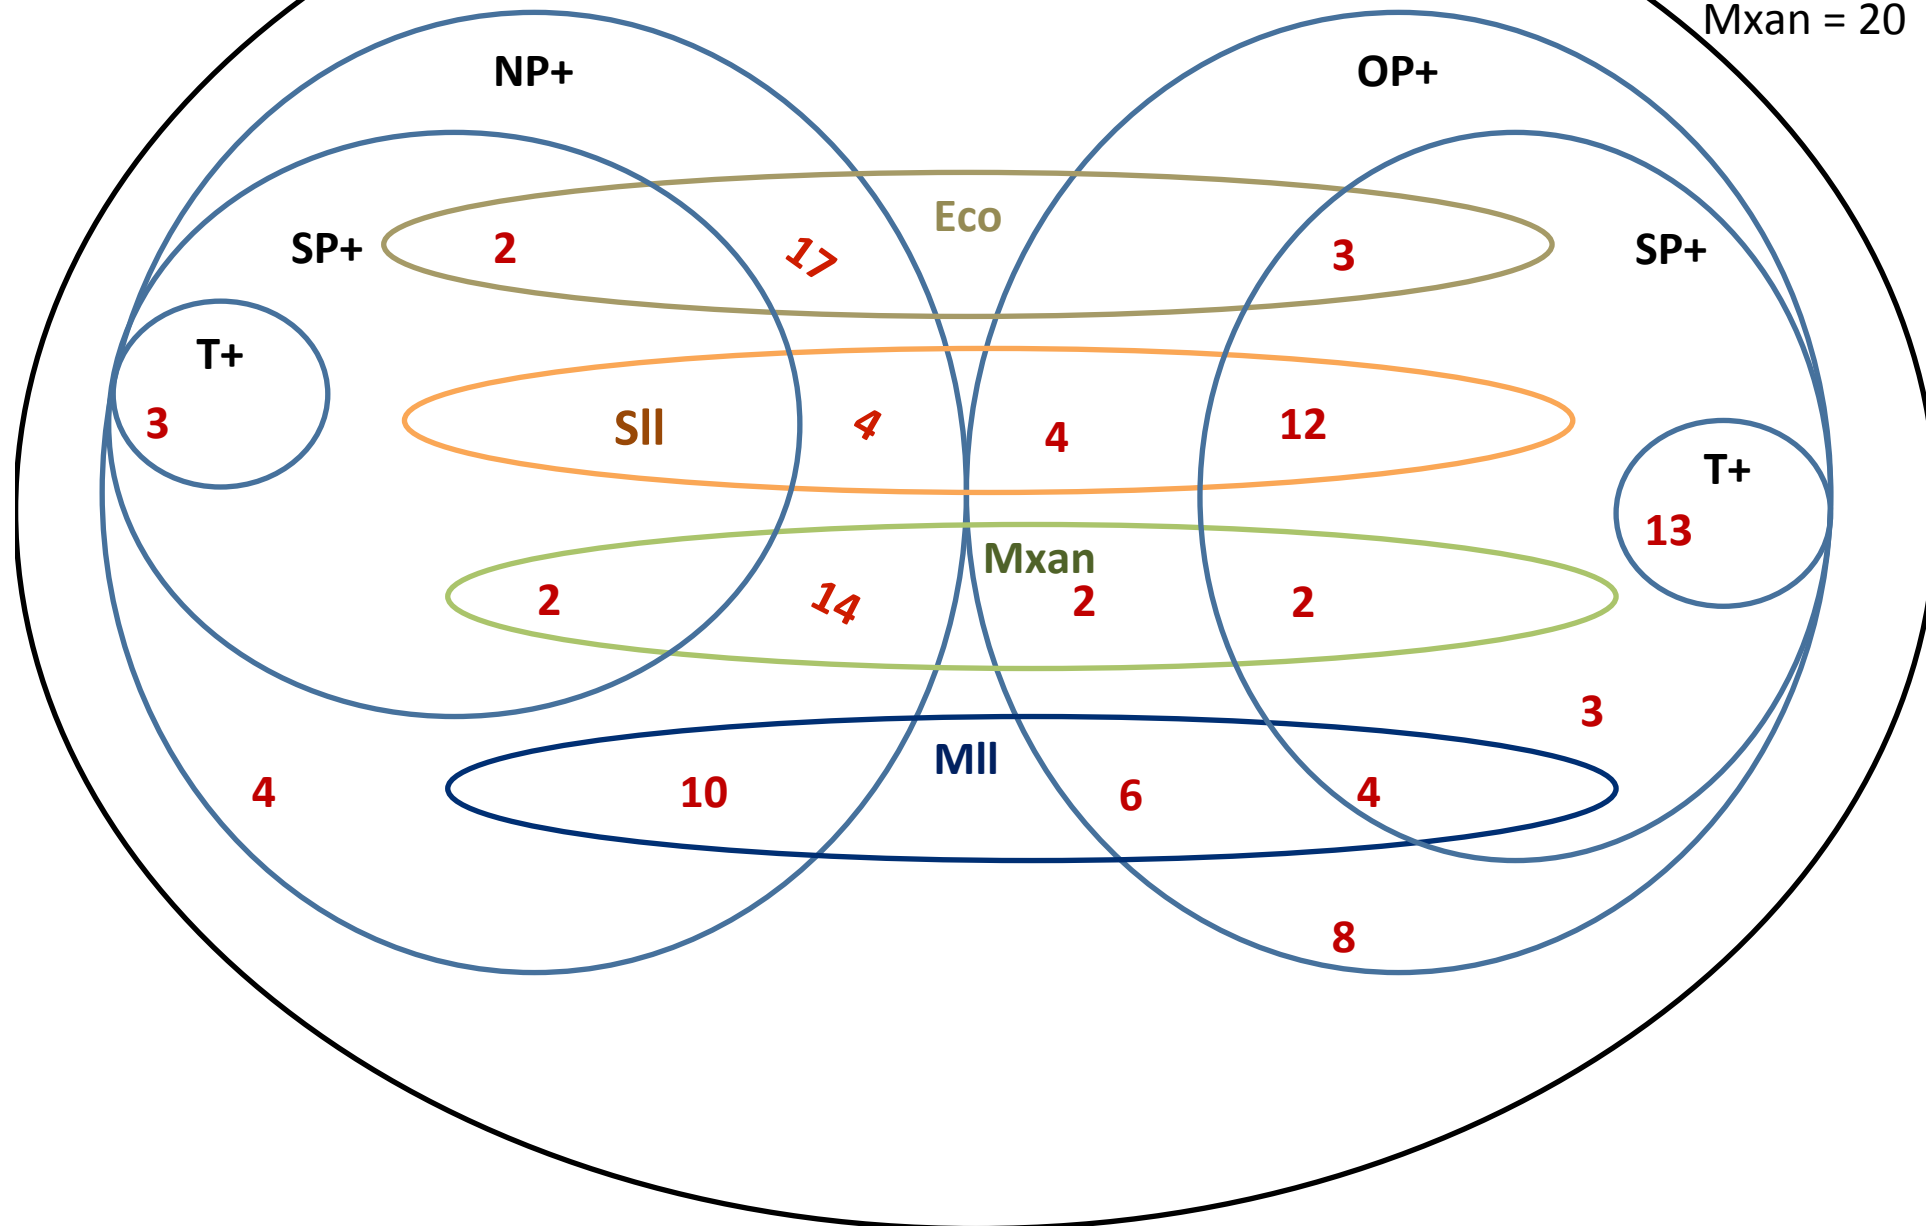

**P- Dataset = 1134**

SP- = 245  
Eco = 64  
Mxan = 216  
SII = 319  
MII = 364  
T- = 5

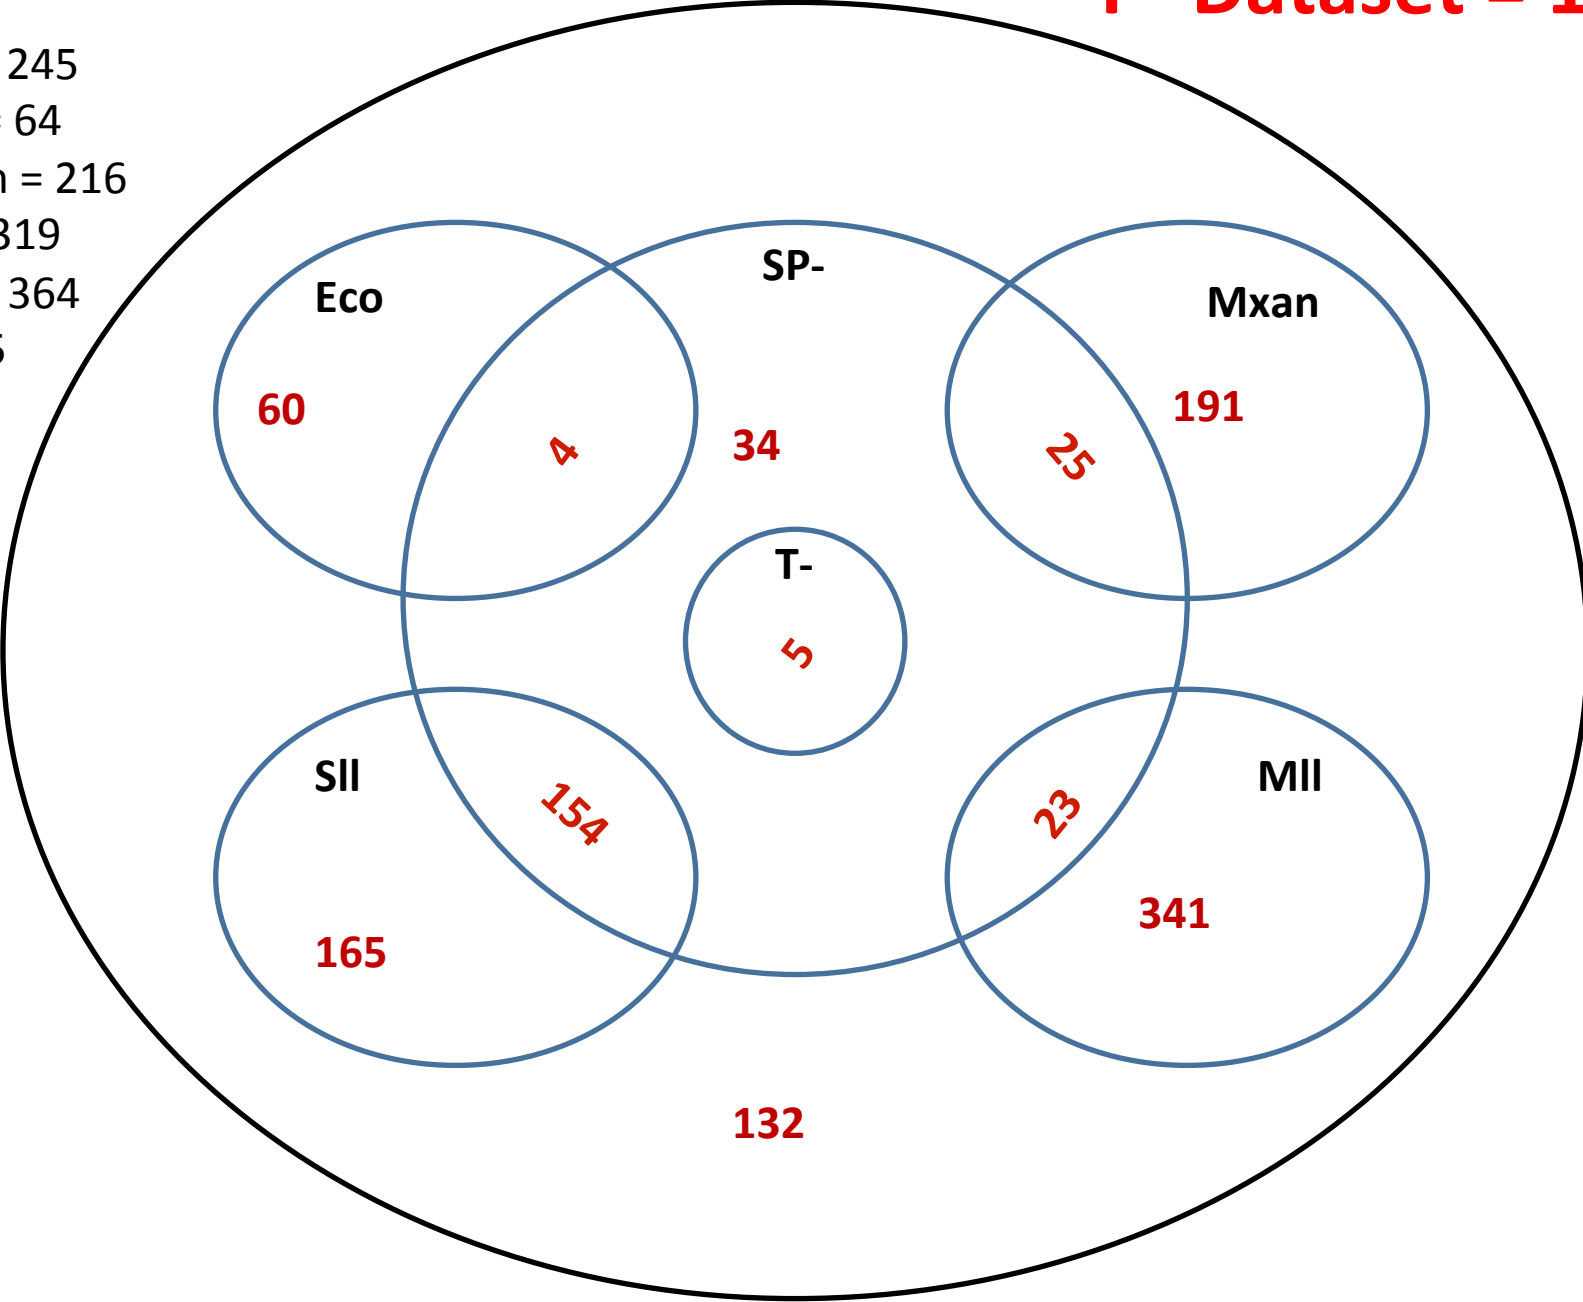

Supplement: 12859_2015_741_MOESM2_ESM.pdf [file 12859_2015_741_MOESM2_ESM.pdf]
